# Supplementary material for: Natural Products from Marine Actinomycete Genus Salinispora Might Inhibit 3CLpro and PLpro Proteins of SARS-CoV-2: An In Silico Evidence
Source: MDPI journal article supplement (doi:10.3390/microbiolres14040130), 2023-11-15
Supplement: s1 [file s1]

# Natural Products from Marine Actinomycete Genus *Salinispora* Might Inhibit 3CLpro and PLpro Proteins of SARS-CoV-2: An In Silico Evidence

Omkar Pokharkar 1, Grigory V. Zyryanov 1,2,\* and Mikhail V. Tsurkan 3

**Table S1.** List of natural products from genus *salinispora* involved in this work.

| Salinispora Genus                         |                      |                      |
|-------------------------------------------|----------------------|----------------------|
| <i>S. arenicola</i>                       | <i>S. pacifica</i>   | <i>S. tropica</i>    |
| Arenamide A - C                           | Cyanosporaside A-F   | Antiprotealide       |
| Arenicolide A - C                         | Desferrioxamine E    | Bromosalinosporamide |
| Arenimycin A - D                          | Enterocin            | Desferrioxamine B    |
| Cycloaspeptide A                          | Homoseongomycin      | Lymphostin           |
| Cyclomarin A, C                           | Lomaiviticin A-E     | Salinosporamide A-J  |
| Cyclomarazine A and B                     | Lymphostin           | Sioxanthin           |
| Ikarugamycin                              | Mycalamide A         | Sporolide A and B    |
| Lovastatin                                | Pacificanone A and B | Salinilactam         |
| Neolymphostin A-D                         | Salinipyrone A and B | Salinipostin A-K     |
| Retimycin A                               | Salinosporamide K    | Salinichelin A-C     |
| Salinaphthoquinone A-E                    | Salinipostin A-K     | Sal-GBL1             |
| Rifamycin B, O, S, SV,W                   | Salinichelin A-C     | Sal-GBL2             |
| 27-O-demethylrifamycin SV                 | Tirandalydigin       |                      |
| 27-O-demethyl-25-O-desacetyl rifamycin SV |                      |                      |
| N-(2'-phenylethyl)isobutyramide           |                      |                      |
| 2-methyl-N-(2'-phenylethyl)butyramide     |                      |                      |
| N-(2'-phenylethyl)isovaleramide           |                      |                      |
| Saliniketal A and B                       |                      |                      |
| Salinilactone A-H                         |                      |                      |
| Saliniquinone A-F                         |                      |                      |
| Salinisporamycin                          |                      |                      |
| Staurosporine                             |                      |                      |
| BE-43547A1                                |                      |                      |
| BE-43547A2                                |                      |                      |
| Isopimara-8,15-diene                      |                      |                      |
| Isopimara-8,15-dien-19-ol                 |                      |                      |
| N-(3-oxodecanoyl)-L-homoserine lactone    |                      |                      |

N-(3-oxododecanoyl)-L-homoserine lactone  
 Salinipostin A-K  
 Salinichelin A-C  
 Rifsaliniketal  
 Neolymphostinol A-D  
 Lymphostinol  
 Emericellamide A and B

**Table S2:** Canonical SMILES for selected natural products

| Top Ligands          | Formulae                                                        | SMILES                                                                                                                  |
|----------------------|-----------------------------------------------------------------|-------------------------------------------------------------------------------------------------------------------------|
| Bromosalinosporamide | C <sub>15</sub> H <sub>20</sub> BrNO<br>4                       | <chem>CC12C(C(=O)NC1(C(=O)O2)C(C3CCCC=C3)O)CCBr</chem>                                                                  |
| Cycloaspeptide A     | C <sub>36</sub> H <sub>43</sub> N <sub>5</sub> O <sub>6</sub>   | <chem>CC1C(=O)N(C(C(=O)NC(C(=O)N(C(C(=O)NC2=CC=CC=C2C(=O)N1)CC3=CC=C(C=C3)O)C)CC(C)C)CC4=CC=CC=C4)C</chem>              |
| Lymphostin           | C <sub>16</sub> H <sub>14</sub> N <sub>4</sub> O <sub>3</sub>   | <chem>CC(=O)N=C1C=C(C2=NC=C3C2=C1NC(=C3)C(=O)C=COC)N</chem>                                                             |
| Neolymphostinol B    | C <sub>16</sub> H <sub>16</sub> N <sub>4</sub> O <sub>3</sub>   | <chem>CCC(=O)NC1=CC(=N)C2=NC=C3C2=C1NC(=C3)C(=O)CCO</chem>                                                              |
| Rifamycin B          | C <sub>39</sub> H <sub>49</sub> N <sub>14</sub> O <sub>14</sub> | <chem>CC1C=CC=C(C(=O)NC2=CC(=C3C(=C2O)C(=C(C4=C3C(=O)C(O4)(OC=CC(C(C(C(C(C(C1O)C)O)C)OC(=O)C)C)OC)C)O)OCC(=O)O)C</chem> |
| Salinaphthoquinone B | C <sub>18</sub> H <sub>15</sub> N <sub>5</sub> O <sub>5</sub>   | <chem>CC1=CC(=C(OC1=O)C2=C(C(=CC3=C2C(=O)C=C(C3=O)N)C)O)C</chem>                                                        |
| Salinaphthoquinone E | C <sub>24</sub> H <sub>27</sub> N <sub>7</sub> O <sub>7</sub>   | <chem>CC1C2C(C(OC1C(C(=O)O2)C)C(C)C(=O)C3=C(C(=CC4=C3C(=O)C=C(C4=O)N)C)O)C</chem>                                       |
| Salinipostin A       | C <sub>25</sub> H <sub>45</sub> O <sub>6</sub> P                | <chem>CCCCCCCCCCCCCCCCOP1(=O)OCC2COC(=O)C2=C(O1)CCCC</chem>                                                             |
| Salinipostin C       | C <sub>23</sub> H <sub>41</sub> O <sub>6</sub> P                | <chem>CCCCCCCCCCCCCCCCOP1(=O)OCC2COC(=O)C2=C(O1)CCCC</chem>                                                             |
| Saliniquinone F      | C <sub>23</sub> H <sub>18</sub> O <sub>6</sub>                  | <chem>Cc1cc2c(c3c1c(=O)cc(o3)[C@](C)(CC=C)O)C(=O)c4c(cccc4O)C2=O</chem>                                                 |
| Salinosporamide C    | C <sub>14</sub> H <sub>18</sub> ClNO<br>3                       | <chem>CC1=C(C(=O)N2C1C(C3C2CC(=O)CC3)O)CCCl</chem>                                                                      |
| Salinosporamide I    | C <sub>16</sub> H <sub>22</sub> ClNO<br>4                       | <chem>CCC12C(C(=O)NC1(C(=O)O2)C(C3CCCC=C3)O)CCCl</chem>                                                                 |
| Salinilactam         | C <sub>28</sub> H <sub>39</sub> N <sub>5</sub> O <sub>5</sub>   | <chem>CC1CC=CC=CC=C(C=CC=CC=CC(C(C(C(C=C=CC(=O)N1)C)O)O)O)C</chem>                                                      |
| Sporolide A          | C <sub>24</sub> H <sub>23</sub> ClO <sub>1</sub><br>2           | <chem>CC1=C2C3(C4C(C1=O)(O4)C(C(=O)OCC(C5=C(C6=C(C=C5)C(C7(C6(O3)C(CC7O)O)O2)O)Cl)O)OC)O</chem>                         |

**Table S3:** 3CL<sup>pro</sup> docking results and residue interactions category 1

| Ligands                                  | Binding affinity<br>('-4.0 to -5.9) | Interacting amino acids                                                                                                             |
|------------------------------------------|-------------------------------------|-------------------------------------------------------------------------------------------------------------------------------------|
| Antiprotealide                           | -5.6                                | HIS41 CYS44 ASP48 MET49 PRO52 TYR54 ASN142 CYS145 HIS163 HIS164 MET165 GLU166 ASP187 ARG188 GLN189                                  |
| Cyclomarin D                             | -5.8                                | THR24 THR25 THR26 LEU27 HIS41 SER46 MET49 TYR54 ASN142 GLY143 SER144 CYS145 HIS164 MET165 GLU166 LEU167 PRO168 ASP187 ARG188 GLN189 |
| Lomaiviticin A                           | -5.8                                | THR24 THR25 HIS41 VAL42 CYS44 SER46 MET49 TYR54 PHE140 LEU141 ASN142 MET165 GLU166 LEU167 PRO168 VAL186 ASP187 ARG188 GLN189 GLN192 |
| N-(3-Oxodecanoyl)-L-homoserine lactone   | -5.2                                | HIS41 MET49 ASN142 CYS145 HIS164 MET165 GLU166 LEU167 PRO168 VAL186 ASP187 ARG188 GLN189 THR190 ALA191 GLN192                       |
| N-(3-oxododecanoyl)-L-homoserine lactone | -5.5                                | HIS41 CYS44 ASP48 MET49 PRO52 TYR54 ASN142 CYS145 HIS164 MET165 GLU166 LEU167 PRO168 ASP187 ARG188 GLN189 THR190 ALA191 GLN192      |
| N-(2'-phenylethyl)isobutyramide          | -5.5                                | HIS41 CYS44 ASP48 MET49 TYR54 CYS145 HIS164 MET165 GLU166 LEU167 PRO168 ASP187 ARG188 GLN189 THR190 GLN192                          |
| N-(2'-phenylethyl)isovaleramide          | -5                                  | HIS41 CYS44 MET49 TYR54 ASN142 GLY143 CYS145 HIS164 MET165 GLU166 LEU167 VAL186 ASP187 ARG188 GLN189 GLN192                         |
| 2-methyl-N-(2'-phenylethyl)butyramide    | -5.9                                | HIS41 CYS44 MET49 TYR54 PHE140 LEU141 ASN142 GLY143 SER144 CYS145 HIS163 HIS164 MET165 GLU166 VAL186 ASP187 ARG188 GLN189 GLN192    |
| Retimycin A                              | -5                                  | HIS41 MET49 TYR54 PHE140 LEU141 ASN142 MET165 GLU166 LEU167 PRO168 VAL186 ASP187 ARG188 GLN189 THR190 GLN192                        |
| Rifamycin B                              | -5.9                                | LEU141 ASN142 GLY143 CYS145 HIS163 HIS164 MET165 GLU166 LEU167 PRO168 GLY170 ARG188 GLN189 THR190 GLN192                            |
| Rifamycin SW                             | -5.5                                | HIS41 MET49 TYR54 ASN142 CYS145 HIS164 MET165 GLU166 LEU167 PRO168 VAL186 ASP187 ARG188 GLN189 THR190 GLN192                        |
| Sal-GBL1                                 | -5.9                                | HIS41 CYS44 ASP48 MET49 LEU50 PRO52 TYR54 CYS145 HIS164 MET165 GLU166 LEU167 VAL186 ASP187 ARG188 GLN189 THR190 GLN192              |

|                 |      |                                                                                                                                 |
|-----------------|------|---------------------------------------------------------------------------------------------------------------------------------|
| Sal-GBL2        | -5.5 | HIS41 CYS44 ASP48 MET49 PRO52 TYR54 CYS145 HIS164 MET165 GLU166 VAL186 ASP187 ARG188 GLN189 GLN192                              |
| Salinilactone A | -5.1 | HIS41 CYS44 ASP48 MET49 PRO52 TYR54 HIS164 MET165 GLU166 ASP187 ARG188 GLN189                                                   |
| Salinilactone B | -4.9 | HIS41 CYS44 ASP48 MET49 PRO52 TYR54 HIS164 MET165 GLU166 ASP187 ARG188 GLN189 GLN192                                            |
| Salinilactone C | -5.1 | HIS41 CYS44 ASP48 MET49 TYR54 CYS145 HIS164 MET165 GLU166 ASP187 ARG188 GLN189 GLN192                                           |
| Salinilactone D | -4.7 | HIS41 CYS44 ASP48 MET49 PRO52 TYR54 HIS164 MET165 ASP187 ARG188 GLN189                                                          |
| Salinilactone E | -5.1 | HIS41 CYS44 ASP48 MET49 TYR54 HIS164 MET165 ASP187 ARG188 GLN189                                                                |
| Salinilactone F | -4.9 | HIS41 CYS44 ASP48 MET49 PRO52 TYR54 HIS164 MET165 ASP187 ARG188 GLN189                                                          |
| Salinilactone G | -5   | HIS41 CYS44 ASP48 MET49 PRO52 TYR54 HIS164 MET165 GLU166 ASP187 ARG188 GLN189 GLN192                                            |
| Salinilactone H | -5.3 | HIS41 CYS44 ASP48 MET49 PRO52 TYR54 HIS164 MET165 GLU166 ASP187 ARG188 GLN189 THR190 GLN192                                     |
| Salinipostin A  | -5.1 | THR25 HIS41 CYS44 MET49 ASN142 CYS145 HIS164 MET165 GLU166 LEU167 PRO168 ASP187 ARG188 GLN189 THR190                            |
| Salinipostin B  | -5.3 | THR25 THR26 LEU27 HIS41 MET49 ASN142 GLY143 CYS145 HIS164 MET165 GLU166 LEU167 PRO168 VAL186 ASP187 ARG188 GLN189 THR190 GLN192 |
| Salinipostin C  | -5.6 | THR25 LEU27 HIS41 CYS44 THR45 MET49 TYR54 ASN142 CYS145 HIS164 MET165 GLU166 ASP187 ARG188 GLN189                               |
| Salinipostin D  | -5.6 | THR25 HIS41 CYS44 MET49 ASN142 CYS145 HIS164 MET165 GLU166 LEU167 PRO168 ASP187 ARG188 GLN189 THR190 ALA191 GLN192              |
| Salinipostin F  | -5.6 | HIS41 CYS44 MET49 TYR54 ASN142 CYS145 HIS164 MET165 GLU166 LEU167 PRO168 VAL186 ASP187 ARG188 GLN189 THR190 GLN192              |
| Salinipostin G  | -5.6 | HIS41 CYS44 MET49 TYR54 ASN142 CYS145 HIS164 MET165 GLU166 LEU167 PRO168 VAL186 ASP187 ARG188 GLN189 THR190 GLN192              |
| Salinipostin H  | -5.8 | HIS41 CYS44 MET49 TYR54 ASN142 CYS145 HIS164 MET165 GLU166 LEU167 PRO168 VAL186 ASP187 ARG188 GLN189 THR190 GLN192              |
| Salinipostin I  | -5.6 | THR24 THR25 THR26 LEU27 HIS41 CYS44 MET49 TYR54 ASN142 GLY143 CYS145 HIS164 MET165 GLU166 VAL186 ASP187 ARG188 GLN189           |

|                |      |                                                                                                                                |
|----------------|------|--------------------------------------------------------------------------------------------------------------------------------|
| Salinipostin J | -5.5 | THR25 HIS41 CYS44 MET49 TYR54 ASN142 CYS145 HIS164 MET165 GLU166 LEU167 PRO168 ASP187 ARG188 GLN189 THR190 ALA191 GLN192       |
| Salinipostin K | -5.9 | THR25 HIS41 CYS44 ASP48 MET49 TYR54 CYS145 HIS164 MET165 GLU166 LEU167 PRO168 VAL186 ASP187 ARG188 GLN189 THR190 ALA191 GLN192 |

**Table S4:** 3CL<sup>pro</sup> docking results and residue interactions category 2 (lower-moderate values)

| Ligands              | Binding affinity<br>('-6 to '- 6.9) | Interacting amino acids                                                                                                                                                                   |
|----------------------|-------------------------------------|-------------------------------------------------------------------------------------------------------------------------------------------------------------------------------------------|
| Arenamide C          | -6.9                                | THR24 THR25 THR26 LEU27 HIS41 MET49 TYR54 LEU141 ASN142 GLY143 SER144 CYS145 HIS163 HIS164 MET165 GLU166 LEU167 PRO168 ASP187 ARG188 GLN189 THR190 ALA191 GLN192                          |
| Arenicolide A        | -6.4                                | THR24 THR25 HIS41 CYS44 THR45 SER46 MET49 TYR54 PHE140 LEU141 ASN142 CYS145 HIS164 MET165 GLU166 VAL186 ASP187 ARG188 GLN189 THR190 GLN192                                                |
| Arenicolide B        | -6.9                                | THR25 HIS41 CYS44 MET49 TYR54 LEU141 ASN142 HIS164 MET165 GLU166 LEU167 PRO168 ASP187 ARG188 GLN189 THR190 ALA191 GLN192                                                                  |
| Arenimycin B         | -6.9                                | THR24 THR25 THR26 HIS41 CYS44 THR45 SER46 MET49 ASN142 GLY143 CYS145 HIS164 MET165 GLU166 LEU167 PRO168 ARG188 GLN189 THR190 GLN192                                                       |
| Bromosalinosporamide | -6.1                                | HIS41 CYS44 MET49 TYR54 ASN142 CYS145 HIS164 MET165 GLU166 PRO168 ASP187 ARG188 GLN189                                                                                                    |
| Cyclomarazine A      | -6.3                                | HIS41 MET49 TYR54 ASN142 CYS145 HIS164 MET165 GLU166 LEU167 PRO168 VAL186 ASP187 ARG188 GLN189 THR190 GLN192                                                                              |
| Cyclomarin A         | -6.5                                | THR25 THR26 LEU27 HIS41 CYS44 SER46 MET49 TYR54 ASN142 GLY143 CYS145 HIS164 MET165 GLU166 LEU167 PRO168 ASP187 ARG188 GLN189 THR190 ALA191 GLN192                                         |
| Cyclomarin C         | -6.5                                | HIS41 CYS44 MET49 TYR54 ASN142 CYS145 HIS164 MET165 GLU166 LEU167 PRO168 ASP187 ARG188 GLN189 THR190 GLN192                                                                               |
| Desferrioxamine B    | -6.2                                | THR25 THR26 LEU27 HIS41 CYS44 THR45 ASP48 MET49 PRO52 TYR54 LEU141 ASN142 GLY143 SER144 CYS145 HIS163 HIS164 MET165 GLU166 LEU167 PRO168 VAL186 ASP187 ARG188 GLN189 THR190 ALA191 GLN192 |
| Emericellamide A     | -6.9                                | THR24 THR25 THR26 LEU27 HIS41 CYS44 THR45 SER46 MET49 ASN142 GLY143 CYS145 HIS164 MET165 GLU166 LEU167 ARG188 GLN189 THR190 GLN192                                                        |

|                           |      |                                                                                                                                                                                                        |
|---------------------------|------|--------------------------------------------------------------------------------------------------------------------------------------------------------------------------------------------------------|
| Isopimara-8,15-dien-19-ol | -6.6 | HIS41 CYS44 ASP48 MET49 TYR54 HIS164 MET165 GLU166 LEU167 PRO168 VAL186 ASP187 ARG188 GLN189 THR190 GLN192                                                                                             |
| Isopimara-8,15-diene      | -6.9 | HIS41 CYS44 MET49 TYR54 CYS145 HIS164 MET165 GLU166 LEU167 PRO168 ASP187 ARG188 GLN189 THR190 ALA191 GLN192                                                                                            |
| Lomaiviticin C            | -6.6 | THR24 THR25 HIS41 CYS44 THR45 SER46 MET49 TYR54 LEU141 ASN142 MET165 GLU166 PRO168 ASP187 ARG188 GLN189 THR190 ALA191 GLN192                                                                           |
| Lomaiviticin E            | -6   | THR24 THR25 THR26 THR45 SER46 GLU47 MET49 LEU50 LEU141 ASN142 CYS145 HIS164 MET165 GLU166 LEU167 PRO168 ARG188 GLN189 THR190 ALA191 GLN192                                                             |
| Mycalamide A              | -6.5 | THR25 LEU27 HIS41 MET49 ASN142 GLY143 CYS145 HIS164 MET165 GLU166 LEU167 PRO168 ARG188 GLN189 THR190 ALA191 GLN192                                                                                     |
| Pacificanone A            | -6.8 | THR25 THR26 LEU27 HIS41 MET49 TYR54 ASN142 GLY143 SER144 CYS145 HIS164 MET165 GLU166 VAL186 ASP187 ARG188 GLN189 THR190 GLN192                                                                         |
| Pacificanone B            | -6.5 | HIS41 CYS44 ASP48 MET49 PRO52 TYR54 PHE140 LEU141 ASN142 GLY143 SER144 CYS145 HIS163 HIS164 MET165 GLU166 VAL186 ASP187 ARG188 GLN189                                                                  |
| Salinaphthoquinone A      | -6.6 | THR25 HIS41 CYS44 ASP48 MET49 PRO52 TYR54 ASN142 CYS145 HIS164 MET165 GLU166 ASP187 ARG188 GLN189                                                                                                      |
| Salinichelin C            | -6.7 | THR25 THR26 LEU27 HIS41 VAL42 CYS44 THR45 ASP48 MET49 LEU50 TYR54 PHE140 LEU141 ASN142 GLY143 SER144 CYS145 HIS163 HIS164 MET165 GLU166 LEU167 PRO168 HIS172 ASP187 ARG188 GLN189 THR190 ALA191 GLN192 |
| Saliniketal B             | -6.7 | HIS41 CYS44 ASP48 MET49 LEU50 PRO52 TYR54 ASN142 GLY143 CYS145 HIS164 MET165 GLU166 LEU167 PRO168 VAL186 ASP187 ARG188 GLN189 THR190 GLN192                                                            |
| Salinipostin E            | -6   | HIS41 CYS44 MET49 TYR54 ASN142 CYS145 HIS164 MET165 GLU166 LEU167 PRO168 VAL186 ASP187 ARG188 GLN189 THR190 ALA191 GLN192                                                                              |
| Salinipyronone A          | -6.3 | THR25 HIS41 VAL42 CYS44 ASP48 MET49 PRO52 TYR54 HIS164 MET165 GLU166 LEU167 PRO168 ASP187 ARG188 GLN189 THR190 ALA191 GLN192                                                                           |
| Salinipyronone B          | -6.6 | HIS41 CYS44 ASP48 MET49 LEU50 TYR54 MET165 GLU166 LEU167 PRO168 ASP187 ARG188 GLN189 THR190 ALA191 GLN192 ALA193                                                                                       |
| Salinosporamide A         | -6.6 | HIS41 CYS44 ASP48 MET49 PRO52 TYR54 PHE140 LEU141 ASN142 SER144 CYS145 HIS163 HIS164 MET165 GLU166 ASP187 ARG188 GLN189                                                                                |

|                   |      |                                                                                                                                |
|-------------------|------|--------------------------------------------------------------------------------------------------------------------------------|
| Salinosporamide B | -6.8 | HIS41 CYS44 ASP48 MET49 PRO52 TYR54 ASN142 CYS145 HIS164 MET165 GLU166 VAL186 ASP187 ARG188 GLN189                             |
| Salinosporamide C | -6.3 | THR25 HIS41 CYS44 MET49 ASN142 CYS145 HIS164 MET165 ASP187 ARG188 GLN189                                                       |
| Salinosporamide E | -6.7 | HIS41 CYS44 ASP48 MET49 PRO52 TYR54 PHE140 LEU141 ASN142 SER144 CYS145 HIS163 HIS164 MET165 GLU166 LEU167 ASP187 ARG188 GLN189 |
| Salinosporamide F | -6.1 | HIS41 ASP48 MET49 TYR54 PHE140 LEU141 ASN142 GLY143 SER144 CYS145 HIS163 HIS164 MET165 GLU166 ASP187 ARG188 GLN189             |
| Salinosporamide G | -6.4 | HIS41 MET49 CYS145 HIS164 MET165 GLU166 LEU167 PRO168 VAL186 ASP187 ARG188 GLN189 THR190 ALA191 GLN192                         |
| Salinosporamide H | -6.5 | HIS41 CYS44 ASP48 MET49 PRO52 TYR54 LEU141 ASN142 CYS145 HIS163 HIS164 MET165 GLU166 ASP187 ARG188 GLN189                      |
| Salinosporamide I | -6.5 | THR25 HIS41 CYS44 MET49 CYS145 HIS164 MET165 GLU166 LEU167 PRO168 ASP187 ARG188 GLN189 GLN192                                  |
| Salinosporamide J | -6.5 | HIS41 CYS44 ASP48 MET49 PRO52 TYR54 PHE140 LEU141 ASN142 SER144 CYS145 HIS163 HIS164 MET165 GLU166 ASP187 ARG188 GLN189        |
| Salinosporamide K | -6.2 | HIS41 CYS44 ASP48 MET49 TYR54 ASN142 CYS145 HIS164 MET165 GLU166 ASP187 ARG188 GLN189                                          |

**TableS5:** 3CL<sup>pro</sup> docking results and residue interactions category 2 (upper-moderate values)

| Ligands       | Binding affinity<br>('-7 to '- 7.9) | Interacting amino acids                                                                                                                                  |
|---------------|-------------------------------------|----------------------------------------------------------------------------------------------------------------------------------------------------------|
| Arenamide A   | -7.5                                | THR24 THR25 THR26 HIS41 CYS44 ASP48 MET49 TYR54 ASN142 CYS145 HIS164 MET165 GLU166 LEU167 PRO168 ASP187 ARG188 GLN189 THR190 ALA191 GLN192               |
| Arenicolide C | -7.1                                | HIS41 MET49 PHE140 LEU141 ASN142 SER144 CYS145 HIS163 HIS164 MET165 GLU166 LEU167 PRO168 ARG188 GLN189 THR190 ALA191 GLN192                              |
| BE-43547A1    | -7                                  | THR25 THR26 LEU27 HIS41 CYS44 ASP48 MET49 TYR54 ASN142 GLY143 CYS145 HIS164 MET165 GLU166 LEU167 PRO168 ASP187 ARG188 GLN189 THR190 ALA191 GLN192        |
| BE-43547A2    | -7                                  | THR25 THR26 LEU27 HIS41 CYS44 ASP48 MET49 TYR54 ASN142 GLY143 CYS145 HIS164 MET165 GLU166 LEU167 PRO168 VAL186 ASP187 ARG188 GLN189 THR190 ALA191 GLN192 |

|                  |      |                                                                                                                                                                      |
|------------------|------|----------------------------------------------------------------------------------------------------------------------------------------------------------------------|
| Cyanosporaside A | -7.5 | HIS41 CYS44 ASP48 MET49 PRO52 TYR54 ASN142 CYS145 HIS164 MET165 GLU166 LEU167 PRO168 VAL186 ASP187 ARG188 GLN189 THR190 ALA191 GLN192                                |
| Cyanosporaside B | -7.7 | THR25 THR26 LEU27 HIS41 VAL42 CYS44 MET49 LEU141 ASN142 GLY143 SER144 CYS145 HIS163 HIS164 MET165 GLU166 ASP187 ARG188 GLN189                                        |
| Cyanosporaside C | -7.6 | THR24 THR25 THR26 LEU27 HIS41 CYS44 MET49 TYR54 LEU141 ASN142 GLY143 SER144 CYS145 HIS164 MET165 GLU166 ASP187 ARG188 GLN189 GLN192                                  |
| Cyanosporaside D | -7.2 | THR25 HIS41 CYS44 ASP48 MET49 PRO52 TYR54 ASN142 CYS145 HIS164 MET165 GLU166 ASP187 ARG188 GLN189                                                                    |
| Cyanosporaside E | -7.1 | THR25 HIS41 CYS44 ASP48 MET49 LEU50 PRO52 TYR54 CYS145 HIS164 MET165 GLU166 ASP187 ARG188 GLN189                                                                     |
| Cyclomarazine B  | -7.1 | THR24 THR25 HIS41 CYS44 THR45 SER46 ASP48 MET49 TYR54 ASN142 GLY143 HIS164 MET165 GLU166 ASP187 ARG188 GLN189 GLN192                                                 |
| Emericellamide B | -7.5 | THR25 HIS41 CYS44 ASP48 MET49 TYR54 ASN142 CYS145 HIS164 MET165 GLU166 LEU167 PRO168 ASP187 ARG188 GLN189 THR190 ALA191 GLN192                                       |
| Enterocin        | -7.7 | THR25 HIS41 CYS44 ASP48 MET49 TYR54 PHE140 LEU141 ASN142 SER144 CYS145 HIS163 HIS164 MET165 GLU166 LEU167 HIS172 ASP187 ARG188 GLN189                                |
| Homoseongomycin  | -7.8 | THR25 HIS41 MET49 TYR54 PHE140 LEU141 ASN142 GLY143 SER144 CYS145 HIS163 HIS164 MET165 GLU166 LEU167 VAL186 ASP187 ARG188 GLN189 THR190 GLN192                       |
| Lomaiviticin B   | -7.1 | HIS41 CYS44 MET49 TYR54 LEU141 ASN142 HIS164 MET165 GLU166 LEU167 PRO168 VAL186 ASP187 ARG188 GLN189 THR190 ALA191 GLN192                                            |
| Lomaiviticin D   | -7.3 | THR24 THR25 THR26 HIS41 VAL42 CYS44 SER46 MET49 LEU50 TYR54 PHE140 LEU141 ASN142 GLY143 HIS164 MET165 GLU166 LEU167 PRO168 ASP187 ARG188 GLN189 THR190 ALA191 GLN192 |
| Lymphostin       | -7.6 | THR25 THR26 LEU27 HIS41 CYS44 MET49 PHE140 LEU141 ASN142 GLY143 SER144 CYS145 HIS163 HIS164 MET165 GLU166                                                            |
| Lymphostinol     | -7.6 | HIS41 CYS44 ASP48 MET49 TYR54 LEU141 ASN142 GLY143 SER144 CYS145 HIS163 HIS164 MET165 GLU166 LEU167 VAL186 ASP187 ARG188 GLN189 GLN192                               |
| Neolymphostin A  | -7.7 | HIS41 CYS44 ASP48 MET49 TYR54 PHE140 LEU141 ASN142 GLY143 SER144 CYS145 HIS163 HIS164 MET165 GLU166 LEU167 VAL186 ASP187 ARG188 GLN189 THR190 GLN192                 |
| Neolymphostin B  | -7.9 | HIS41 CYS44 ASP48 MET49 PRO52 TYR54 LEU141 ASN142 GLY143 SER144 CYS145 HIS163 HIS164 MET165 GLU166 LEU167 VAL186 ASP187 ARG188 GLN189 THR190 GLN192                  |



|                      |      |                                                                                                                                                                                        |
|----------------------|------|----------------------------------------------------------------------------------------------------------------------------------------------------------------------------------------|
| Neolymphostin C      | -7.3 | THR25 THR26 LEU27 HIS41 MET49 TYR54 PHE140 LEU141 ASN142 GLY143 SER144 CYS145 HIS163 HIS164 MET165 GLU166 VAL186 ASP187 ARG188 GLN189 THR190 GLN192                                    |
| Neolymphostinol A    | -7.4 | HIS41 CYS44 ASP48 MET49 LEU50 PRO52 TYR54 LEU141 ASN142 GLY143 CYS145 HIS164 MET165 GLU166 LEU167 PRO168 ASP187 ARG188 GLN189 THR190 GLN192                                            |
| Neolymphostinol B    | -7.7 | HIS41 CYS44 MET49 LEU141 ASN142 GLY143 SER144 CYS145 HIS163 HIS164 MET165 GLU166 ASP187 ARG188 GLN189 THR190 GLN192                                                                    |
| Neolymphostinol C    | -7.5 | HIS41 CYS44 ASP48 MET49 LEU50 PRO52 TYR54 LEU141 ASN142 CYS145 HIS164 MET165 GLU166 LEU167 PRO168 ASP187 ARG188 GLN189 THR190 GLN192                                                   |
| Neolymphostinol D    | -7.6 | THR25 THR26 LEU27 HIS41 CYS44 MET49 TYR54 LEU141 ASN142 GLY143 SER144 CYS145 HIS163 HIS164 MET165 GLU166 ASP187 ARG188 GLN189                                                          |
| Rifamycin S          | -7.9 | THR24 THR25 THR26 HIS41 MET49 ASN142 GLY143 CYS145 HIS164 MET165 GLU166 VAL186 ASP187 ARG188 GLN189 THR190 GLN192                                                                      |
| Rifamycin W          | -7.5 | THR25 HIS41 CYS44 ASP48 MET49 PRO52 TYR54 ASN142 GLY143 CYS145 MET165 GLU166 LEU167 PRO168 THR169 GLY170 VAL186 ASP187 ARG188 GLN189 GLN192                                            |
| Salinaphthoquinone E | -7.6 | HIS41 MET49 ASN142 GLY143 CYS145 HIS163 MET165 GLU166 ARG188 GLN189                                                                                                                    |
| Salinichelin A       | -7.7 | THR24 THR25 THR26 LEU27 HIS41 SER46 MET49 PHE140 LEU141 ASN142 GLY143 SER144 CYS145 HIS163 HIS164 MET165 GLU166 LEU167 PRO168 HIS172 ASP187 ARG188 GLN189 THR190 ALA191 GLN192         |
| Salinichelin B       | -7.1 | THR25 THR26 LEU27 HIS41 MET49 TYR54 TYR118 PHE140 LEU141 ASN142 GLY143 SER144 CYS145 HIS163 HIS164 MET165 GLU166 LEU167 PRO168 HIS172 VAL186 ASP187 ARG188 GLN189 THR190 ALA191 GLN192 |
| Saliniketal A        | -7   | HIS41 MET49 TYR54 CYS145 HIS164 MET165 GLU166 LEU167 PRO168 VAL186 ASP187 ARG188 GLN189 THR190 ALA191 GLN192                                                                           |
| Salinilactam         | -7.5 | HIS41 MET49 ASN142 CYS145 HIS164 MET165 GLU166 LEU167 PRO168 ASP187 ARG188 GLN189 THR190 ALA191 GLN192                                                                                 |
| Saliniquinone E      | -7.8 | THR25 THR26 LEU27 HIS41 CYS44 MET49 TYR54 LEU141 ASN142 CYS145 MET165 GLU166 ASP187 ARG188 GLN189                                                                                      |
| Salinosporamide D    | -7   | HIS41 CYS44 ASP48 MET49 TYR54 ASN142 CYS145 HIS164 MET165 GLU166 VAL186 ASP187 ARG188 GLN189                                                                                           |
| Sporolide A          | -7   | THR24 THR25 HIS41 MET49 ASN142 GLY143 CYS145 HIS164 MET165 GLU166 LEU167 ASP187 ARG188 GLN189                                                                                          |
| Sporolide B          | -7.3 | THR24 THR25 HIS41 CYS44 MET49 ASN142 GLY143 CYS145 HIS164 MET165 GLU166 ASP187 ARG188 GLN189                                                                                           |
| Staurosporine        | -7.6 | HIS41 MET49 ASN142 HIS164 MET165 GLU166 LEU167 PRO168 VAL186 ASP187 ARG188 GLN189 THR190 GLN192                                                                                        |

|                           |      |                                                                                                                                                                          |
|---------------------------|------|--------------------------------------------------------------------------------------------------------------------------------------------------------------------------|
| Sioxanthin                | -7.2 | ARG40 GLU55 MET82 GLN83 ASN84 CYS85 ARG105 PRO132 ASN133 PHE134 GLY179 ASN180 PHE181 TYR182 GLY183 PRO184 PHE185 VAL186 GLY195 THR196 ASP197 THR198 ASN238 GLU240 PRO241 |
| Tirandalydigin            | -7.5 | THR24 THR25 HIS41 VAL42 CYS44 THR45 SER46 ASP48 MET49 TYR54 ASN142 CYS145 HIS164 MET165 GLU166 ASP187 ARG188 GLN189 GLN192                                               |
| 27-O-demethylrifamycin SV | -7.8 | THR24 THR25 THR26 LEU27 HIS41 SER46 MET49 LEU141 ASN142 GLY143 SER144 CYS145 HIS163 HIS164 MET165 GLU166 ARG188 GLN189 GLN192                                            |

**Table S6:** 3CL<sup>pro</sup> docking results and residue interactions (category 3)

| Ligands           | Binding affinity ('-8.0 and higher) | Interacting amino acids                                                                                                                                           |
|-------------------|-------------------------------------|-------------------------------------------------------------------------------------------------------------------------------------------------------------------|
| Arenamide B       | -8.2                                | THR25 HIS41 CYS44 THR45 MET49 TYR54 ASN142 CYS145 HIS164 MET165 GLU166 LEU167 PRO168 THR169 GLY170 VAL186 ASP187 ARG188 GLN189 THR190 ALA191 GLN192               |
| Arenimycin A      | -8.5                                | THR25 THR26 LEU27 HIS41 CYS44 MET49 TYR54 ASN142 GLY143 CYS145 HIS164 MET165 GLU166 LEU167 PRO168 THR169 GLY170 VAL186 ASP187 ARG188 GLN189 THR190 ALA191 GLN192  |
| Arenimycin C      | -8.5                                | THR24 THR25 THR26 LEU27 HIS41 MET49 TYR118 ASN119 ASN142 GLY143 CYS145 HIS164 MET165 GLU166 LEU167 PRO168 ARG188 GLN189 THR190 ALA191 GLN192                      |
| Arenimycin D      | -8.7                                | THR25 THR26 LEU27 HIS41 CYS44 MET49 TYR54 ASN142 GLY143 CYS145 HIS164 MET165 GLU166 LEU167 PRO168 GLY170 VAL186 ASP187 ARG188 GLN189 THR190 ALA191 GLN192         |
| Cyanosporaside F  | -8.2                                | THR25 THR26 HIS41 CYS44 MET49 TYR54 PHE140 LEU141 ASN142 GLY143 SER144 CYS145 HIS163 HIS164 MET165 GLU166 LEU167 PRO168 HIS172 ASP187 ARG188 GLN189 THR190 GLN192 |
| CycloaspeptideA   | -8.5                                | HIS41 CYS44 MET49 TYR54 PHE140 LEU141 ASN142 GLY143 SER144 CYS145 HIS163 HIS164 MET165 GLU166 PRO168 HIS172 VAL186 ASP187 ARG188 GLN189 THR190 ALA191 GLN192      |
| Desferrioxamine E | -8.5                                | HIS41 MET49 PHE140 LEU141 ASN142 GLY143 SER144 CYS145 HIS163 HIS164 MET165 GLU166 LEU167 PRO168 VAL186 ARG188 GLN189 THR190 ALA191 GLN192                         |
| Ikarugamycin      | -9                                  | THR25 HIS41 VAL42 CYS44 MET49 ASN142 GLY143 CYS145 MET165 GLU166 LEU167 PRO168 ARG188 GLN189 THR190 ALA191 GLN192                                                 |

|                                           |      |                                                                                                                                                                   |
|-------------------------------------------|------|-------------------------------------------------------------------------------------------------------------------------------------------------------------------|
| Lovastatin                                | -8   | THR25 THR26 LEU27 HIS41 CYS44 ASP48 MET49 LEU50 PRO52 TYR54 PHE140 LEU141 ASN142 GLY143 SER144 CYS145 HIS163 HIS164 MET165 GLU166 ASP187 ARG188 GLN189            |
| Neolymphostin D                           | -8.2 | HIS41 CYS44 ASP48 MET49 PRO52 TYR54 PHE140 LEU141 ASN142 GLY143 SER144 CYS145 HIS163 HIS164 MET165 GLU166 LEU167 PRO168 VAL186 ASP187 ARG188 GLN189 THR190 GLN192 |
| Rifsaliniketal                            | -8.5 | THR25 HIS41 CYS44 ASP48 MET49 TYR54 PHE140 LEU141 ASN142 GLY143 SER144 CYS145 HIS163 HIS164 MET165 GLU166 LEU167 PRO168 ASP187 ARG188 GLN189 THR190 GLN192        |
| Rifamycin O                               | -8   | THR25 LEU27 HIS41 VAL42 MET49 ASN142 GLY143 CYS145 HIS164 MET165 GLU166 LEU167 PRO168 ARG188 GLN189 THR190 ALA191 GLN192                                          |
| Salinaphthoquinone B                      | -8.2 | HIS41 MET49 ASN142 GLY143 CYS145 HIS163 MET165 GLU166 LEU167 PRO168 ASP187 ARG188 GLN189 THR 190 GLN 192                                                          |
| Salinaphthoquinone C                      | -8   | HIS41 CYS44 ASP48 MET49 LEU50 TYR54 ASN142 CYS145 HIS164 MET165 GLU166 LEU167 PRO168 VAL186 ASP187 ARG188 GLN189 THR190 ALA191 GLN192                             |
| Salinaphthoquinone D                      | -8.2 | THR25 HIS41 MET49 TYR54 LEU141 ASN142 GLY143 SER144 CYS145 HIS163 HIS164 MET165 GLU166 ASP187 ARG188 GLN189                                                       |
| Saliniquinone A                           | -8   | THR24 THR25 THR26 LEU27 HIS41 CYS44 MET49 LEU50 TYR54 ASN142 GLY143 CYS145 GLU166 ASP187 ARG188 GLN189                                                            |
| Saliniquinone B                           | -8   | THR25 THR26 LEU27 HIS41 CYS44 ASP48 MET49 LEU50 TYR54 ASN142 GLY143 CYS145 GLU166 ASP187 ARG188 GLN189                                                            |
| Saliniquinone C                           | -8.2 | HIS41 CYS44 ASP48 MET49 PRO52 TYR54 LEU141 ASN142 CYS145 HIS164 MET165 GLU166 LEU167 PRO168 VAL186 ASP187 ARG188 GLN189 THR190 ALA191 GLN192                      |
| Saliniquinone D                           | -8   | THR25 THR26 LEU27 HIS41 CYS44 MET49 LEU50 TYR54 ASN142 GLY143 CYS145 MET165 GLU166 ASP187 ARG188 GLN189                                                           |
| Saliniquinone F                           | -8.2 | HIS41 CYS44 MET49 TYR54 ASN142 CYS145 HIS164 MET165 GLU166 PRO168 ASP187 ARG188 GLN189 THR190 ALA191 GLN192                                                       |
| Salinisporamycin                          | -8.2 | THR24 THR25 THR26 LEU27 HIS41 VAL42 CYS44 MET49 ASN142 GLY143 CYS145 HIS164 MET165 GLU166 LEU167 PRO168 ARG188 GLN189 THR190 GLN192                               |
| 27-O-demethyl-25-O-desacetyl rifamycin SV | -8.5 | THR24 THR25 THR26 HIS41 CYS44 SER46 MET49 LEU141 ASN142 GLY143 SER144 CYS145 HIS163 HIS164 MET165 GLU166 GLN189                                                   |

**Table S7:** PL<sup>pro</sup> docking results and residue interactions (category 1)

| Ligands              | Binding affinity<br>('-4.0 to -5.9) | Interacting amino acids                                                                                                                               |
|----------------------|-------------------------------------|-------------------------------------------------------------------------------------------------------------------------------------------------------|
| Antiprotealide       | -5.5                                | ASP164 ARG166 MET208 SER245 ALA246 PRO247 PRO248 TYR264 TYR268 GLN269 TYR273 THR301 ASP302                                                            |
| Arenamide C          | -4.8                                | TRP106 ALA107 ASN109 ASN110 CYS111 LEU162 THR265 GLY266 GLN269 CYS270 GLY271 HIS272                                                                   |
| Arenicolide B        | -5.7                                | ASP164 ARG166 MET208 PRO247 PRO248 TYR264 GLY266 ASN267 TYR268 CYS270 TYR273 THR301                                                                   |
| Arenimycin B         | -5.9                                | ASP164 ARG166 MET208 PRO247 PRO248 ALA249 GLN250 TYR264 THR265 GLY266 ASN267 TYR268 PRO299<br>THR301                                                  |
| Bromosalinosporamide | -5.5                                | PRO247 PRO248 ALA249 GLN250 TYR264 THR265 GLY266 ASN267 TYR268 GLN269 PRO299                                                                          |
| Cyanosporaside A     | -5.1                                | TRP106 ALA107 ASP108 ASN109 ASN110 CYS111 THR265 GLY266 GLN269 CYS270 GLY271 HIS272                                                                   |
| Cyanosporaside C     | -5.7                                | TRP106 ALA107 ASN109 ASN110 CYS111 LEU162 THR265 GLN269 CYS270 GLY271 HIS272 ASP286 ASP164 PRO248<br>ALA249 GLN250 TYR264 GLY266 ASN267 TYR268 PRO299 |
| Cyanosporaside D     | -5                                  | LEU162 GLY163 ASP164 VAL165 ARG166 GLU167 MET208 SER245 ALA246 PRO247 PRO248 TYR264 TYR268<br>GLN269 TYR273 THR301 ASP302                             |
| Cyclomarin A         | -4.5                                | TRP106 ALA107 ASP108 ASN109 ASN110 CYS111 LEU162 THR265 GLY266 ASN267 GLN269 CYS270 GLY271<br>HIS272 LYS274                                           |
| Cyclomarin C         | -5.2                                | TRP106 ALA107 ASP108 ASN109 ASN110 CYS111 LEU162 THR265 GLY266 ASN267 GLN269 CYS270 GLY271<br>HIS272 LYS274 ASP286                                    |
| Cyclomarin D         | -4.7                                | TRP106 ALA107 ASP108 ASN109 ASN110 CYS111 LEU162 GLU263 THR265 GLY266 ASN267 CYS270 GLY271<br>HIS272 LYS274 ASP286 LEU289                             |
| Emericellamide A     | -5.5                                | TRP106 ALA107 ASP108 ASN109 ASN110 CYS111 LEU162 THR265 CYS270 GLY271 HIS272                                                                          |
| Enterocin            | -5.9                                | TRP106 ASN109 CYS111 LEU162 THR265 GLY266 GLN269 CYS270 GLY271 HIS272 TYR273 PRO247 PRO248<br>ALA249 GLN250 TYR264 THR265 GLY266 ASN267 TYR268 PRO299 |
| Isopimara-8,15-diene | -5.5                                | ASP164 PRO247 PRO248 TYR264 GLY266 ASN267 TYR268 GLN269 TYR273 THR301                                                                                 |
| Lomaiviticin A       | -5.2                                | TRP106 ASN109 LEU162 GLN250 GLU263 THR265 CYS270 GLY271 HIS272 LYS274 CYS284 ASP286 TYR296 LYS297                                                     |
| Lomaiviticin B       | -4.5                                | ASN109 CYS111 LEU162 GLU263 THR265 GLY266 ASN267 CYS270 GLY271 HIS272 LYS274 ASP286                                                                   |

|                 |      |                                                                                                                                                    |
|-----------------|------|----------------------------------------------------------------------------------------------------------------------------------------------------|
| Lomaiviticin C  | -4.8 | TRP106 ALA107 ASP108 ASN109 ASN110 CYS111 LEU162 THR265 GLY266 ASN267 GLN269 CYS270 GLY271 HIS272 LYS274                                           |
| Lomaiviticin D  | -5   | TRP106 PRO248 ALA249 GLN250 TYR264 THR265 GLY266 ASN267 CYS270 HIS272 LYS274 ASP286 PRO299                                                         |
| Lomaiviticin E  | -5.5 | TRP106 ALA107 ASP108 ASN109 ASN110 CYS111 TYR112 GLU161 LEU162 GLY163 TYR264 THR265 ASN267 GLN269 CYS270 GLY271 HIS272 TYR273 LYS274               |
| Mycalamide A    | -5.1 | TYR112 GLY163 ASP164 VAL165 ARG166 GLU167 MET208 ALA246 PRO247 PRO248 TYR264 TYR268 GLN269 TYR273 THR301 ASP302                                    |
| Pacifcanone A   | -5.7 | ASP164 ARG166 MET208 ALA246 PRO247 PRO248 TYR264 GLY266 ASN267 TYR268 GLN269 TYR273 THR301                                                         |
| Rifamycin SV    | -5.5 | TRP106 ALA107 ASP108 ASN109 ASN110 CYS111 LEU162 ASN267 CYS270 GLY271 HIS272 ASP286                                                                |
| Rifamycin W     | -5.5 | TRP106 ALA107 ASP108 ASN109 ASN110 CYS111 THR265 GLY266 ASN267 CYS270 GLY271 HIS272 LYS274                                                         |
| Salinilactam    | -5.6 | TRP106 ASN109 LEU162 THR265 GLY266 CYS270 GLY271 HIS272 LYS274 ASP286                                                                              |
| Salinilactone A | -5.9 | LEU162 GLY163 ASP164 VAL165 ALA246 PRO247 PRO248 TYR264 ASN267 TYR268 GLN269 CYS270 GLY271 TYR273 THR301                                           |
| Salinilactone B | -5.9 | LEU162 GLY163 ASP164 VAL165 PRO248 TYR264 ASN267 TYR268 GLN269 CYS270 GLY271 TYR273 THR301                                                         |
| Salinilactone D | -5.5 | ASP164 VAL165 ALA246 PRO247 PRO248 TYR264 ASN267 TYR268 GLN269 CYS270 GLY271 TYR273 THR301                                                         |
| Salinilactone E | -5.7 | ASP164 ARG166 MET208 SER245 ALA246 PRO247 PRO248 TYR264 TYR268 GLN269 TYR273 THR301 ASP302                                                         |
| Salinilactone F | -5.7 | GLY163 ASP164 VAL165 ARG166 MET208 ALA246 PRO247 PRO248 TYR264 ASN267 TYR268 GLN269 CYS270 TYR273 THR301                                           |
| Salinilactone G | -5.9 | LEU162 GLY163 ASP164 ARG166 MET208 ALA246 PRO247 PRO248 TYR264 ASN267 TYR268 GLN269 CYS270 GLY271 TYR273 THR301                                    |
| Salinipostin C  | -5.9 | TRP106 ASN109 ASN110 CYS111 TYR112 LEU162 GLY163 TYR264 THR265 CYS270 GLY271 HIS272 TYR273 LYS274                                                  |
| Salinipostin D  | -5.9 | CYS111 TYR112 LYS157 LEU162 GLY163 ASP164 ARG166 GLU167 MET208 ALA246 PRO247 PRO248 TYR264 ASN267 TYR268 GLN269 CYS270 GLY271 HIS272 TYR273 THR301 |
| Salinipostin F  | -5.9 | LYS157 GLU161 LEU162 GLY163 ASP164 ARG166 GLU167 MET208 ALA246 PRO247 PRO248 TYR264 TYR268 GLN269 CYS270 TYR273 THR301                             |
| Salinipostin G  | -5.5 | GLY163 ASP164 ARG166 MET208 ALA246 PRO247 PRO248 ALA249 GLN250 TYR264 THR265 GLY266 ASN267 TYR268 GLN269 TYR273 PRO299 THR301                      |

|                                               |      |                                                                                                                                                                                    |
|-----------------------------------------------|------|------------------------------------------------------------------------------------------------------------------------------------------------------------------------------------|
| Salinipostin H                                | -5.9 | LYS157 LEU162 GLY163 ASP164 ARG166 GLU167 MET208 PRO247 PRO248 TYR264 GLY266 ASN267 TYR268<br>GLN269 CYS270 TYR273 THR301                                                          |
| Salinipostin I                                | -5.9 | ASP164 ARG166 MET208 ALA246 PRO247 PRO248 ALA249 GLN250 TYR264 THR265 GLY266 ASN267 TYR268<br>GLN269 CYS270 TYR273 PRO299 THR301                                                   |
| Salinipostin K                                | -5.9 | TRP106 ALA107 ASP108 ASN109 ASN110 CYS111 TYR112 LEU162 GLY163 ASP164 PRO248 TYR264 TYR268<br>GLN269 CYS270 GLY271 HIS272 TYR273 THR301                                            |
| Salinosporamide C                             | -5.8 | ASP164 ARG166 MET208 PRO247 PRO248 TYR264 GLY266 ASN267 TYR268 GLN269 TYR273 THR301                                                                                                |
| Salinosporamide E                             | -4.9 | TRP106 ALA107 ASN109 ASN110 CYS111 LEU162 GLN269 CYS270 GLY271 HIS272 TYR273                                                                                                       |
| Salinosporamide F                             | -5.9 | LEU162 GLY163 ASP164 VAL165 ARG166 MET208 ALA246 PRO247 PRO248 TYR264 GLY266 ASN267 TYR268<br>GLN269 CYS270 GLY271 TYR273 THR301                                                   |
| Salinosporamide I                             | -5.7 | LEU162 GLY163 ASP164 VAL165 ARG166 MET208 SER245 ALA246 PRO247 PRO248 TYR264 ASN267 TYR268<br>GLN269 GLY271 TYR273 THR301 ASP302                                                   |
| Sporolide A                                   | -4.8 | TRP106 ASN109 CYS111 LEU162 CYS270 GLY271 HIS272                                                                                                                                   |
| Sporolide B                                   | -4.4 | ASN109 GLY160 LEU162 TYR268 GLN269 CYS270 GLY271 HIS272                                                                                                                            |
| Sioxanthin                                    | -4.9 | HIS73 THR74 ASP76 SER78 PHE79 ARG82 ALA153 TYR154 ASN156 ASP164 ARG166 GLU167 SER170 TYR171<br>GLN174 HIS175 MET206 MET208 PRO247 PRO248 TYR264 GLY266 ASN267 TYR268 GLN269 THR301 |
| 27-O-demethylrifamycin SV                     | -5.2 | TRP106 ASN109 CYS111 LEU162 THR265 GLY266 ASN267 GLN269 CYS270 GLY271 HIS272                                                                                                       |
| 27-O-demethyl-25-O-desacetyl-<br>rifamycin SV | -5.5 | TRP106 ASN109 CYS111 LEU162 THR265 GLY266 ASN267 GLN269 CYS270 GLY271 HIS272 LYS274 ASP286                                                                                         |

**Table S8:** PL<sup>pro</sup> docking results and residue interactions category 2 (lower-moderate values)

| Ligands           | Binding affinity<br>( <sup>-6.0 to -6.9</sup> ) | Interacting amino acids                                                                                                                                                 |
|-------------------|-------------------------------------------------|-------------------------------------------------------------------------------------------------------------------------------------------------------------------------|
| Arenamide A       | -6.5                                            | TRP106 ALA107 ASP108 ASN109 ASN110 CYS111 TYR112 LEU162 GLY163 TYR264 THR265 GLY266 ASN267 GLN269 CYS270 GLY271_HIS272 LYS274                                           |
| Arenamide B       | -6.8                                            | TRP106 ALA107 ASP108 ASN109 ASN110 CYS111 LEU162 GLY163 TYR264 THR265 GLY266 ASN267 GLN269 CYS270 GLY271 HIS272 LYS274                                                  |
| Arenicolide A     | -6.1                                            | ASP164 ARG166 MET208 ALA246 PRO247 PRO248 ALA249 GLN250 TYR264 GLY266 ASN267 TYR268 GLN269 TYR273 THR301                                                                |
| Arenicolide C     | -6.9                                            | LEU162 GLY163 ASP164 PRO247 PRO248 TYR264 GLY266 ASN267 TYR268 GLN269 CYS270 TYR273 THR301                                                                              |
| Arenimycin A      | -6.7                                            | TRP106 ALA107 ASP108 ASN109 ASN110 CYS111 LEU162 GLN269 CYS270 GLY271 HIS272 LYS274 ASP286 LEU289 THR291                                                                |
| Arenimycin C      | -6                                              | TRP106 ALA107 ASP108 ASN109 ASN110 CYS111 THR265 CYS270 GLY271 HIS272 LYS274 CYS284 ILE285 ASP286 LEU289 THR291                                                         |
| BE-43547A1        | -6.5                                            | TRP106 ASN109 ASN110 CYS111 LEU162 GLY163 ASP164 TYR264 ASN267 TYR268 GLN269 CYS270 GLY271 HIS272 TYR273 LYS274 ASP286                                                  |
| BE-43547A2        | -6.2                                            | LEU162 GLY163 ASP164 VAL165 PRO247 PRO248 ALA249 GLN250 TYR264 GLY266 ASN267 TYR268 GLN269 CYS270 GLY271 TYR273 PRO299                                                  |
| Cyanosporaside B  | -6.1                                            | TRP106 ALA107 ASN109 ASN110 CYS111 LEU162 GLY163 GLN269 CYS270 GLY271 HIS272                                                                                            |
| Cyanosporaside E  | -6.5                                            | ASP164 ARG166 MET208 PRO247 PRO248 TYR264 GLY266 ASN267 TYR268 GLN269 TYR273                                                                                            |
| Cyanosporaside F  | -6.5                                            | ASN109 CYS111 TYR112 LYS157 LEU162 GLY163 ASP164 ARG166 GLU167 MET208 PRO247 PRO248 TYR264 GLY266 ASN267 TYR268 GLN269 CYS270 GLY271 TYR273 THR301                      |
| CycloaspeptideA   | -6                                              | TRP106 ALA107 ASP108 ASN109 CYS111 TYR112 LEU162 GLY163 TYR264 CYS270 GLY271 HIS272 TYR273 ASP286                                                                       |
| Cyclomarazine A   | -6.5                                            | ASP164 MET208 ALA246 PRO247 PRO248 TYR264 GLY266 ASN267 TYR268 TYR273 THR301 LYS157 LEU162 GLY163 ARG166                                                                |
| Desferrioxamine B | -6.9                                            | LYS157 GLU161 LEU162 GLY163 ASP164 VAL165 ARG166 GLU167 MET208 SER245 ALA246 PRO247 PRO248 ALA249 GLN250 TYR264 GLY266 ASN267 TYR268 GLN269 TYR273 PRO299 THR301 ASP302 |
| Desferrioxamine E | -6.2                                            | TRP106 ALA107 ASP108 ASN109 ASN110 CYS111 VAL159 GLY160 LEU162 GLN269 CYS270 GLY271 HIS272                                                                              |

|                                          |      |                                                                                                                                                                                |
|------------------------------------------|------|--------------------------------------------------------------------------------------------------------------------------------------------------------------------------------|
| Emericellamide B                         | -6.1 | TRP106 ALA107 ASP108 ASN109 ASN110 CYS111 LEU162 ASP164 PRO247 PRO248 ALA249 GLN250 TYR264 THR265 GLY266 ASN267 TYR268 GLN269 CYS270 GLY271 HIS272 ASP286 TYR273 PRO299 THR301 |
| Isopimara-8,15-dien-19-ol                | -6.5 | GLY163 ASP164 ARG166 MET208 ALA246 PRO247 PRO248 TYR264 GLY266 ASN267 TYR268 GLN269 TYR273 THR301                                                                              |
| Lovastatin                               | -6.5 | GLY163 ASP164 VAL165 ARG166 MET208 SER245 ALA246 PRO247 PRO248 TYR264 GLY266 ASN267 TYR268 GLN269 TYR273 THR301 ASP302                                                         |
| N-(3-Oxodecanoyl)-L-homoserine lactone   | -6.5 | ASN109 CYS111 TYR112 LEU162 GLY163 ASP164 VAL165 ARG166 MET208 ALA246 PRO247 PRO248 TYR264 ASN267 TYR268 GLN269 CYS270 GLY271 HIS272 TYR273 THR301                             |
| N-(3-oxododecanoyl)-L-homoserine lactone | -6.7 | ASN109 CYS111 TYR112 LEU162 GLY163 ASP164 ARG166 GLU167 MET208 PRO247 PRO248 TYR264 ASN267 TYR268 GLN269 CYS270 GLY271 TYR273 THR301                                           |
| N-(2'-phenylethyl)isobutyramide          | -6.9 | ASN109 CYS111 TYR112 LEU162 GLY163 ASP164 VAL165 PRO248 TYR264 ASN267 TYR268 GLN269 CYS270 GLY271 TYR273 THR301                                                                |
| N-(2'-phenylethyl)isovaleramide          | -6.2 | LYS157 LEU162 GLY163 ASP164 VAL165 GLU167 PRO247 PRO248 TYR264 TYR268 GLN269 GLY271 TYR273 THR301                                                                              |
| 2-methyl-N-(2'-phenylethyl)butyramide    | -6.7 | LEU162 GLY163 ASP164 VAL165 PRO247 PRO248 TYR264 GLY266 ASN267 TYR268 GLN269 CYS270 GLY271 TYR273 THR301                                                                       |
| Pacificanone B                           | -6.5 | ASN109 CYS111 TYR112 LYS157 LEU162 GLY163 ASP164 GLU167 TYR264 TYR268 GLN269 CYS270 GLY271 HIS272 TYR273                                                                       |
| Rifsaliniketal                           | -6.9 | ASP164 ARG166 MET208 ALA246 PRO247 PRO248 ALA249 GLN250 TYR264 THR265 GLY266 ASN267 TYR268 GLN269 CYS270 TYR273 PRO299 THR301                                                  |
| Rifamycin B                              | -6   | TRP106 ALA107 ASN109 ASN110 CYS111 LEU162 THR265 GLN269 CYS270 GLY271 HIS272 LYS274 ASP286                                                                                     |
| Rifamycin O                              | -6.5 | TRP106 ALA107 ASP108 ASN109 ASN110 GLU263 THR265 GLY266 ASN267 CYS270 GLY271 HIS272 LYS274 ASP286                                                                              |
| Rifamycin S                              | -6.1 | TRP106 ASN109 LEU162 GLU263 THR265 GLY266 ASN267 CYS270 GLY271 HIS272 LYS274 ASP286                                                                                            |
| Sal-GBL1                                 | -6.1 | TYR112 LEU162 GLY163 ASP164 VAL165 GLU167 PRO247 PRO248 TYR264 ASN267 TYR268 GLN269 CYS270 GLY271 TYR273 THR301                                                                |
| Sal-GBL2                                 | -6   | LEU162 GLY163 ASP164 GLU167 ARG166 MET208 SER245 ALA246 PRO247 PRO248 TYR264 TYR268 GLN269 CYS270 GLY271 TYR273 THR301 ASP302                                                  |
| Salinaphthoquinone A                     | -6.5 | LYS157 LEU162 GLY163 ASP164 ARG166 GLU167 TYR264 TYR268 GLN269 CYS270 GLY271 TYR273                                                                                            |
| Salinaphthoquinone B                     | -6.5 | TRP106 ALA107 ASN109 ASN110 CYS111 LEU162 GLY163 CYS270 GLY271 HIS272                                                                                                          |



|                      |      |                                                                                                                                                                   |
|----------------------|------|-------------------------------------------------------------------------------------------------------------------------------------------------------------------|
| Salinaphthoquinone C | -6.7 | GLY163 ASP164 VAL165 ARG166 MET208 PRO247 PRO248 TYR264 GLY266 ASN267 TYR268 GLN269 CYS270 GLY271 TYR273 THR301                                                   |
| Salinaphthoquinone E | -6.9 | PRO247 PRO248 ALA249 GLN250 TYR264 THR265 GLY266 ASN267 TYR268 GLN269 CYS270 PRO299                                                                               |
| Salinichelin A       | -6.5 | TRP106 ALA107 ASP108 ASN109 ASN110 CYS111 TYR112 GLY160 LEU162 GLY163 ASP164 GLU263 TYR264 THR265 GLN269 CYS270 GLY271 HIS272 TYR273 LYS274                       |
| Salinichelin B       | -6.5 | LYS157, LEU162 GLY163 ASP164 VAL165 ARG166 GLU167 MET208 ALA246 PRO247 PRO248 GLN250 TYR264 THR265 GLY266 ASN267 TYR268 GLN269 CYS270 GLY271 TYR273 PRO299 THR301 |
| Salinichelin C       | -6.5 | TYR112 LEU162 GLY163 ASP164 ARG166 GLU167 MET208 ALA246 PRO247 PRO248 ALA249 GLN250 TYR264 GLY266 ASN267 TYR268 GLN269 CYS270 GLY271 HIS272 TYR273 PRO299 THR301  |
| Saliniketal A        | -6.9 | ASP164 ARG166 MET208 ALA246 PRO247 PRO248 ALA249 GLN250 TYR264 THR265 GLY266 ASN267 TYR268 GLN269 TYR273 PRO299 THR301                                            |
| Saliniketal B        | -6.9 | GLY163 ASP164 VAL165 ARG166 MET208 ALA246 PRO247 PRO248 ALA249 GLN250 TYR264 THR265 GLY266 ASN267 TYR268 GLN269 TYR273 PRO299 THR301                              |
| Salinilactone C      | -6.1 | LEU162 GLY163 ASP164 ARG166 MET208 SER245 ALA246 PRO247 PRO248 TYR264 TYR268 GLN269 TYR273 THR301 ASP302                                                          |
| Salinilactone H      | -6.6 | LEU162 GLY163 ASP164 ARG166 MET208 SER245 ALA246 PRO247 PRO248 TYR264 TYR268 GLN269 GLY271 TYR273 THR301 ASP302                                                   |
| Salinipostin A       | -6   | ASN109 ASN110 CYS111 TYR112 LEU162 GLY163 ASP164 ARG166 GLU167 MET208 ALA246 PRO247 PRO248 TYR264 ASN267 TYR268 GLN269 CYS270 GLY271 HIS272 TYR273 THR301         |
| Salinipostin B       | -6.1 | TRP106 ASN109 CYS111 TYR112 LEU162 GLY163 ASP164 PRO248 TYR264 TYR268 GLN269 CYS270 GLY271 HIS272 TYR273 THR301                                                   |
| Salinipostin E       | -6   | TRP106 ALA107 ASP108 ASN109 ASN110 CYS111 TYR112 LEU162 GLY163 ASP164 PRO248 TYR264 TYR268 GLN269 CYS270 GLY271 HIS272 TYR273 THR301                              |
| Salinipostin J       | -6.7 | ASN109 CYS111 TYR112 LYS157 LEU162 GLY163 ASP164 ARG166 GLU167 MET208 ALA246 PRO247 PRO248 TYR264 GLY266 ASN267 TYR268 GLN269 CYS270 GLY271 HIS272 TYR273 THR301  |
| Saliniquinone A      | -6.9 | TRP106 ASN109 CYS111 LEU162 THR265 GLY266 ASN267 CYS270 GLY271 HIS272 LYS274 ASP286                                                                               |
| Salinosporamide A    | -6.5 | LYS157 LEU162 GLY163 ASP164 VAL165 ARG166 MET208 ALA246 PRO247 PRO248 TYR264 GLY266 ASN267 TYR268 GLN269 CYS270 GLY271 TYR273 THR301 ASP302                       |

|                   |      |                                                                                                                                      |
|-------------------|------|--------------------------------------------------------------------------------------------------------------------------------------|
| Salinosporamide D | -6.5 | LEU162 GLY163 ASP164 ARG166 MET208 ALA246 PRO247 PRO248 TYR264 ASN267 TYR268 GLN269 CYS270 GLY271 TYR273 THR301                      |
| Salinosporamide G | -6.5 | LEU162 GLY163 ASP164 VAL165 ARG166 MET208 ALA246 PRO247 PRO248 TYR264 ASN267 TYR268 GLN269 CYS270 GLY271 TYR273 THR301               |
| Salinosporamide H | -6.1 | LEU162 GLY163 ASP164 VAL165 ARG166 MET208 ALA246 PRO247 PRO248 TYR264 GLY266 ASN267 TYR268 GLN269 CYS270 GLY271 TYR273 THR301        |
| Salinosporamide J | -6.5 | LYS157 LEU162 GLY163 ASP164 ARG166 MET208 SER245 ALA246 PRO247 PRO248 TYR264 ASN267 TYR268 GLN269 CYS270 GLY271 TYR273 THR301 ASP302 |

**Table S9:** PL<sup>pro</sup> docking results and residue interactions category 2 (upper-moderate values)

| Ligands         | Binding affinity<br>( <sup>-</sup> 7.0 to <sup>-</sup> 7.9) | Interacting amino acids                                                                                                              |
|-----------------|-------------------------------------------------------------|--------------------------------------------------------------------------------------------------------------------------------------|
| Arenimycin D    | -7.7                                                        | ASP164 ARG166 GLU167 MET208 PRO247 PRO248 TYR264 THR265 GLY266 ASN267 TYR268 GLN269 THR301                                           |
| Cyclomarazine B | -7.9                                                        | ASP164 ARG166 MET208 ALA246 PRO247 PRO248 ALA249 GLN250 TYR264 THR265 GLY266 ASN267 TYR268 TYR273 PRO299 THR301 HIS272               |
| Ikarugamycin    | -7.2                                                        | ASP164 ARG166 MET208 PRO247 PRO248 ALA249 TYR264 GLY266 ASN267 TYR268 GLN269 TYR273 THR301                                           |
| Lymphostin      | -7.6                                                        | LYS157 LEU162 GLY163 ASP164 ARG166 GLU167 MET208 ALA246 PRO247 PRO248 TYR264 TYR268 GLN269 TYR273 THR301                             |
| Lymphostinol    | -7.2                                                        | LYS157 LEU162 GLY163 ASP164 ARG166 GLU167 ALA246 PRO248 TYR264 TYR268 GLN269 TYR273 THR301 ASP302                                    |
| Retimycin A     | -7.7                                                        | TRP106 ASN109 CYS111 LEU162 TYR264 THR265 GLY266 ASN267 GLN269 CYS270 GLY271 HIS272 LYS274                                           |
| Salinipyrone A  | -7                                                          | LYS157 LEU162 GLY163 ASP164 VAL165 GLU167 PRO247 PRO248 TYR264 GLY266 ASN267 TYR268 GLN269 TYR273                                    |
| Salinipyrone B  | -7.5                                                        | LYS157 LEU162 GLY163 ASP164 ARG166 GLU167 MET208 SER245 ALA246 PRO247 PRO248 TYR264 ASN267 TYR268 GLN269 GLY271 TYR273 THR301 ASP302 |
| Saliniquinone C | -7                                                          | TRP106 ALA107 ASN109 ASN110 CYS111 THR265 GLY266 ASN267 CYS270 GLY271 HIS272 LYS274 ASP286 LEU289                                    |
| Saliniquinone D | -7.5                                                        | LYS157 LEU162 GLY163 ASP164 ARG166 GLU167 MET208 PRO248 TYR264 ASN267 TYR268 GLN269 CYS270 GLY271 TYR273 THR301                      |
| Saliniquinone F | -7.5                                                        | LYS157 LEU162 GLY163 ASP164 ARG166 GLU167 PRO248 TYR264 GLY266 ASN267 TYR268 GLN269 CYS270 GLY271 TYR273 THR301                      |

|                   |      |                                                                                                                                      |
|-------------------|------|--------------------------------------------------------------------------------------------------------------------------------------|
| Salinosporamide B | -7.2 | LYS157 LEU162 GLY163 ASP164 VAL165 ARG166 MET208 ALA246 PRO247 PRO248 TYR264 GLY266 ASN267 TYR268 GLN269 CYS270 GLY271 TYR273 THR301 |
| Staurosporine     | -7.2 | TRP106 ASN109 THR265 GLY266 ASN267 CYS270 GLY271 HIS272 LYS274 ASP286                                                                |
| Tirandalydigin    | -7.9 | ASP164 VAL165 ARG166 MET208 ALA246 PRO247 PRO248 ALA249 GLN250 TYR264 THR265 GLY266 ASN267 TYR268 GLN269 TYR273 PRO299 THR301 ASP302 |

**Table S10:** PL<sup>pro</sup> docking results and residue interactions (category 3)

| Ligands              | Binding affinity<br>(-8.0 and higher) | Interacting amino acids                                                                                                                            |
|----------------------|---------------------------------------|----------------------------------------------------------------------------------------------------------------------------------------------------|
| Homoseongomycin      | -8.5                                  | LYS157 LEU162 GLY163 ASP164 ARG166 GLU167 MET208 ALA246 PRO247 PRO248 TYR264 GLY266 ASN267 TYR268 GLN269 CYS270 GLY271 TYR273 THR301               |
| Neolymphostin A      | -8.2                                  | LYS157 LEU162 GLY163 ASP164 ARG166 GLU167 PRO247 PRO248 TYR264 ASN267 TYR268 GLN269 TYR273 THR301                                                  |
| Neolymphostin B      | -8.2                                  | LYS157 LEU162 GLY163 ASP164 ARG166 GLU167 PRO248 TYR264 ASN267 TYR268 GLN269 TYR273 THR301                                                         |
| Neolymphostin C      | -8.2                                  | LYS157 LEU162 GLY163 ASP164 ARG166 GLU167 MET208 ALA246 PRO247 PRO248 TYR264 ASN267 TYR268 GLN269 TYR273 THR301                                    |
| Neolymphostin D      | -8.2                                  | ASN109 CYS111 TYR112 LYS157 LEU162 GLY163 ASP164 ARG166 GLU167 MET208 PRO248 TYR264 ASN267 TYR268 GLN269 CYS270 GLY271 HIS272 TYR273 THR301        |
| Neolymphostinol A    | -8                                    | TRP106 ALA107 ASP108 ASN109 ASN110 CYS111 TYR112 GLU161 LYS157 LEU162 GLY163 ASP164 ARG166 GLU167 PRO248 TYR264 ASN267 TYR268 GLN269 TYR273 THR301 |
| Neolymphostinol B    | -8.2                                  | LYS157 LEU162 GLY163 ASP164 ARG166 GLU167 MET208 PRO248 TYR264 ASN267 TYR268 GLN269 TYR273 THR301                                                  |
| Neolymphostinol C    | -8                                    | TRP106 ALA107 ASP108 ASN109 ASN110 CYS111 TYR112 LEU162 GLY163 TYR264 GLN269 CYS270 GLY271 HIS272 TYR273                                           |
| Neolymphostinol D    | -8.2                                  | LYS157 LEU162 GLY163 ASP164 ARG166 GLU167 MET208 PRO247 PRO248 TYR264 GLY266 ASN267 TYR268 GLN269 CYS270 TYR273 THR301                             |
| Salinaphthoquinone D | -8.7                                  | LYS157 LEU162 GLY163 ASP164 ARG166 GLU167 PRO248 TYR264 GLY266 ASN267 TYR268 GLN269 CYS270 GLY271 TYR273                                           |
| Saliniquinone B      | -8                                    | LYS157 LEU162 GLY163 ASP164 ARG166 GLU167 MET208 PRO247 PRO248 TYR264 TYR268 GLN269 CYS270 GLY271 TYR273 THR301                                    |

|                  |      |                                                                                                                                             |
|------------------|------|---------------------------------------------------------------------------------------------------------------------------------------------|
| Saliniquinone E  | -8   | LYS157 LEU162 GLY163 ASP164 ARG166 GLU167 MET208 SER245 ALA246 PRO247 PRO248 TYR264 ASN267 TYR268 GLN269 CYS270 GLY271 TYR273 THR301 ASP302 |
| Salinisporamycin | -8.2 | TRP106 ALA107 ASN109 ASN110 CYS111 TYR112 LYS157 LEU162 GLY163 ASP164 ARG166 GLU167 TYR264 TYR268 GLN269 CYS270 GLY271 HIS272 TYR273        |

**Table S11.** Predicted biological activities for candidate NPs.

| <b>PASS spectra</b>  |                                                                                                                                                                                                                                                                                                                                                                           |
|----------------------|---------------------------------------------------------------------------------------------------------------------------------------------------------------------------------------------------------------------------------------------------------------------------------------------------------------------------------------------------------------------------|
| <b>Top Ligands</b>   | <b>Potential Bioactivity</b>                                                                                                                                                                                                                                                                                                                                              |
| Bromosalinosporamide | Antiviral, Antibacterial, Anticancer, Antineoplastic, Autoimmune disease treatment, Interleukin 10 antagonist, and a Cytokine release inhibitor.                                                                                                                                                                                                                          |
| Cycloaspeptide A     | Antiviral, Antifungal, Antifungal enhancer, Anticancer, Antineoplastic alkaloid, Antineoplastic enhancer, Respiratory distress syndrome treatment, , Interleukin 2 and 4 antagonist, Immunosuppressant, Toll-Like receptor antagonist, and a CC chemokine receptor 2B antagonist.                                                                                         |
| Lymphostin           | Antiviral, Antineoplastic, Anticancer, Antibacterial, Antibiotic, Interleukin 1 and 1b antagonist, Immunosuppressant, and a Macrophage stimulant.                                                                                                                                                                                                                         |
| Neolymphostinol B    | Antineoplastic, Anticancer, Antiviral, Thiol protease inhibitor, Leukotriene agonist, and a Macrophage colony-stimulating factor agonist.                                                                                                                                                                                                                                 |
| Rifamycin B          | Antiviral, Antifungal, Anti-infective, Antibiotic, Antineoplastic, Anticancer, Anti-tuberculosic, Cytochrome P450 stimulant, Immunostimulant, Histidine kinase inhibitor, Beta glucuronidase inhibitor, Cytokine release inhibitor, and a T cell inhibitor.                                                                                                               |
| Salinaphthoquinone B | Antiviral, Antiseptic, Antineoplastic, Anti-parasitic, Antibacterial, Anti-infective, Antifungal, Anti-inflammatory, Anti-tuberculosic, Antioxidant, Free radical scavenger, Hepatoprotectant, Immunosuppressant, Kinase inhibitor, Histidine kinase inhibitor, and a Histamine release inhibitor.                                                                        |
| Salinaphthoquinone E | Antineoplastic, Anticancer, Antifungal, Antifungal enhancer, Anti-inflammatory, Immunosuppressant, Interleukin 1, 2, 5, 10 antagonist, Antibacterial, Anti-parasitic, Antibiotic, Beta glucuronidase inhibitor, Kinase inhibitor, Histidine kinase inhibitor, Antioxidant, T cell inhibitor, Cytokine release inhibitor, Histamine release inhibitor, and an Expectorant. |

|                   |                                                                                                                                                                                                                                                                                                                                                                |
|-------------------|----------------------------------------------------------------------------------------------------------------------------------------------------------------------------------------------------------------------------------------------------------------------------------------------------------------------------------------------------------------|
| Salinipostin A    | Antiviral, Anti-diabetic, Anticancer, Toll-Like receptor antagonist, Histamine release stimulant, Alpha-glucuronidase inhibitor, Lipase inhibitor, Rhizopuspepsin inhibitor, Transcription factor NF kappa B stimulant, and a Macrophage colony-stimulating factor agonist.                                                                                    |
| Salinipostin C    | Antiviral, Anti-diabetic, Anticancer, Lipase inhibitor, Alpha-glucuronidase inhibitor, Rhizopuspepsin inhibitor, Toll-Like receptor antagonist, Histamine release stimulant, Leukotriene agonist, Transcription factor NF kappa B stimulant, and a Macrophage colony-stimulating factor agonist.                                                               |
| Saliniquinone F   | Antifungal, Antibacterial, Anti-parasitic, Anticancer, Antineoplastic, Antioxidant, Kinase inhibitor, Histidine kinase inhibitor, Antiseptic, Histamine release inhibitor, Free radical scavenger, Transcription factor NF kappa B stimulant, Respiratory analeptic, Beta glucuronidase inhibitor, and a Leukotriene synthesis inhibitor.                      |
| Salinosporamide C | Antiviral, Anticancer, Antineoplastic, Respiratory analeptic, protease inhibitor, Transcription factor NF kappa B stimulant, JAK2 expression inhibitor, Histidine kinase inhibitor, Interleukin 10 antagonist.                                                                                                                                                 |
| Salinosporamide I | Antiviral, Antifungal, Anti-asthmatic, Antineoplastic alkaloid, Antibacterial, Anticancer, protease inhibitor, Autoimmune disorders treatment, Cytokine release inhibitor, and an Interleukin 10 antagonist.                                                                                                                                                   |
| Salinilactam      | Antiviral, Anti-infective, Antibacterial, Anti-tuberculosic, Antioxidant, Antineoplastic alkaloid, Anticancer, Antibiotic, Anti-parasitic, Antifungal, Antifungal enhancer, Beta glucuronidase inhibitor, Immunosuppressant, Transcription factor NF kappa B stimulant, Interferon-gamma antagonist, Cytokine release inhibitor, and Interleukin 10 antagonist |
| Sporolide A       | An antineoplastic alkaloid, Antioxidant, Anticancer, Antibiotic, Beta glucuronidase inhibitor, Antifungal, Antibacterial, Immunosuppressant, Interleukin 1 and 10 antagonist, Histidine kinase inhibitor, Cytokine release inhibitor, and a Transcription factor NF kappa B stimulant.                                                                         |
